# Supplementary material for: Tissue metabolomic profiling to reveal the therapeutic mechanism of reduning injection on LPS-induced acute lung injury rats
Source: Royal Society of Chemistry journal article supplement (doi:10.1039/c7ra13123b), 2018-01-01
Supplement: c7ra13123b1.pdf [file c7ra13123b1.pdf]

Table S1 A Gradient elution program on T3 column.

| Time (min) | Flow (mL/min) | A%  | B% | Curve |
|------------|---------------|-----|----|-------|
| 0          | 0.2           | 100 | 0  | —     |
| 0.5        | 0.2           | 100 | 0  | 6     |
| 20         | 0.2           | 5   | 95 | 6     |
| 21         | 0.2           | 5   | 95 | 6     |
| 24         | 0.2           | 100 | 0  | 1     |

B Gradient elution program on C18 column.

| Time (min) | Flow (mL/min) | A% | B%  | Curve |
|------------|---------------|----|-----|-------|
| 0          | 0.2           | 65 | 35  | —     |
| 0.5        | 0.2           | 65 | 35  | 6     |
| 20         | 0.2           | 0  | 100 | 6     |
| 21         | 0.2           | 0  | 100 | 6     |
| 24         | 0.2           | 65 | 35  | 1     |

Table S2 Identification results of 14 potential biomarkers in lung tissue.

| No. | <i>m/z</i> | Quasi-molecular ion  | MS/MS |       | Fomula                                                      | Identification   | CAS      |
|-----|------------|----------------------|-------|-------|-------------------------------------------------------------|------------------|----------|
| 1   | 103.9      | [M + H] <sup>+</sup> | 60.0  | 45.0  | C <sub>5</sub> H <sub>13</sub> NO                           | Choline          | 62-49-7  |
| 2   | 112.9      | [M + H] <sup>+</sup> | 95.9  | 70.0  | C <sub>4</sub> H <sub>4</sub> N <sub>2</sub> O <sub>2</sub> | Uracil           | 66-22-8  |
| 3   | 118.0      | [M + H] <sup>+</sup> | 58.8  | 57.1  | C <sub>5</sub> HNO <sub>2</sub>                             | Betaine          | 590-46-5 |
| 4   | 122.9      | [M + H] <sup>+</sup> | 79.9  | 78.0  | C <sub>6</sub> H <sub>6</sub> N <sub>2</sub> O              | Niacinamide      | 98-92-0  |
| 5   | 132.0      | [M + H] <sup>+</sup> | 99.0  | 87.0  | C <sub>4</sub> H <sub>9</sub> N <sub>3</sub> O <sub>2</sub> | Creatine         | 57-00-1  |
| 6   | 136.9      | [M + H] <sup>+</sup> | 118.8 | 109.8 | C <sub>5</sub> H <sub>4</sub> N <sub>4</sub> O              | Hypoxanthine     | 68-94-0  |
|     |            |                      | 93.7  | 81.6  |                                                             |                  |          |
| 7   | 153.0      | [M + H] <sup>+</sup> | 136.0 | 110.0 | C <sub>5</sub> H <sub>4</sub> N <sub>4</sub> O <sub>2</sub> | Xanthine         | 69-89-6  |
| 8   | 162.1      | [M + H] <sup>+</sup> | 103.0 | 60.1  | C <sub>7</sub> H <sub>15</sub> NO <sub>3</sub>              | Carnitine        | 541-15-1 |
| 9   | 274.3      | [M + H] <sup>+</sup> | 256.3 | 239.2 | C <sub>16</sub> H <sub>35</sub> NO <sub>2</sub>             | C16 sphinganine  | ---      |
| 10  | 302.3      | [M + H] <sup>+</sup> | 284.3 | 60.0  | C <sub>18</sub> H <sub>39</sub> NO <sub>2</sub>             | Sphinganine      | 764-22-7 |
| 11  | 318.3      | [M + H] <sup>+</sup> | 300.3 | 256.3 | C <sub>18</sub> H <sub>39</sub> NO <sub>3</sub>             | Phytosphingosine | ---      |
| 12  | 496.2      | [M + H] <sup>+</sup> | 478.3 | 184.3 | C <sub>24</sub> H <sub>50</sub> NO <sub>7</sub> P           | LPC (16:0)       | ---      |
|     |            |                      | 103.8 | 85.5  |                                                             |                  |          |
| 13  | 524.3      | [M + H] <sup>+</sup> | 506.4 | 184.0 | C <sub>26</sub> H <sub>54</sub> NO <sub>7</sub> P           | LPC (18:0)       | ---      |
|     |            |                      | 103.8 |       |                                                             |                  |          |
| 14  | 544.3      | [M + H] <sup>+</sup> | 526.3 | 287.2 | C <sub>28</sub> H <sub>50</sub> NO <sub>7</sub> P           | LPC (20:4)       | ---      |
|     |            |                      | 240.1 |       |                                                             |                  |          |
